# Supplementary material for: Evidence of tetraphenylporphyrin monoacids by ion-transfer voltammetry at polarized liquid|liquid interfaces
Source: Royal Society of Chemistry journal article supplement (doi:10.1039/b811886h), 2008-01-01
Supplement: b811886h.pdf [file b811886h.pdf]

## Supporting Information

### Evidence of Tetraphenylporphyrin Monoacids by Ion-Transfer Voltammetry at Polarized Liquid|Liquid Interfaces

*Bin Su,<sup>a</sup> Fei Li,<sup>a</sup> Raheleh P. Nia,<sup>a</sup> Claude Gros,<sup>b</sup> Jean-Michel Barbe,<sup>b</sup> Zdenek Samec<sup>c</sup> and Hubert H. Girault<sup>\*a</sup>*

<sup>a</sup> Laboratoire d'Electrochimie Physique et Analytique, Ecole Polytechnique Fédérale de Lausanne, Station 6, CH-1015 Lausanne, Switzerland, Fax: +41 21 6933667; Tel: +41 21 6933145; E-mail: [hubert.girault@epfl.ch](mailto:hubert.girault@epfl.ch)

<sup>b</sup> Institut de Chimie Moléculaire de l'Université de Bourgogne, ICMUB-UMR 5260, 21078 Dijon Cedex, France

<sup>c</sup> J. Heyrovsky Institute of Physical Chemistry of ASCR, v.v.i, Dolejskova 3, 182 23 Prague 8, Czech Republic

### S1. Cyclic voltammetry of 50 $\mu\text{M}$ $\text{H}_2\text{TPP}$ at various scan rates

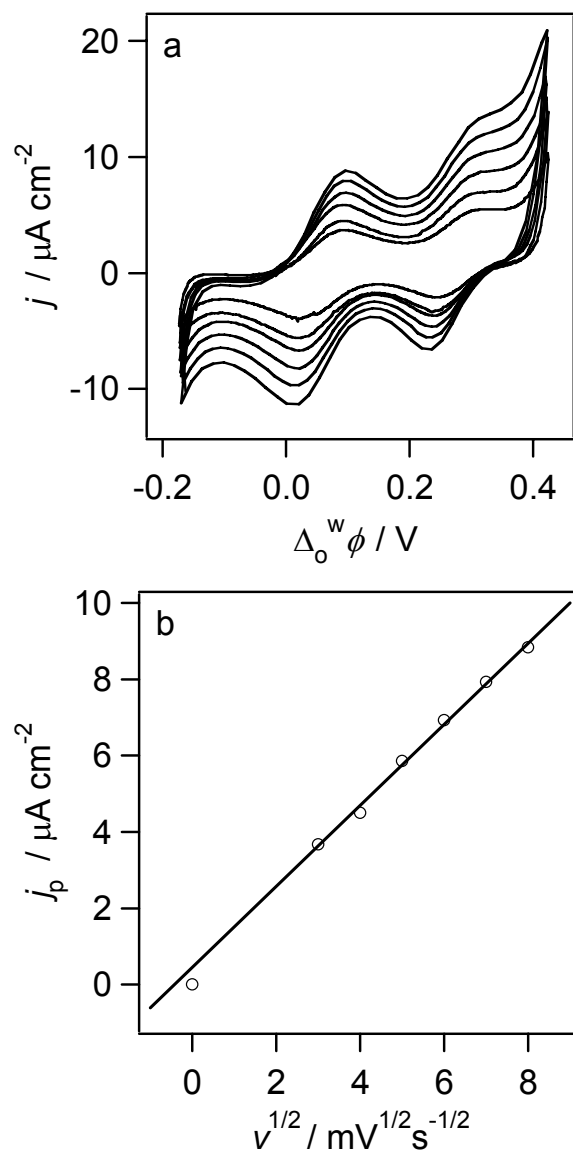

Figure S1. (a) CVs at various scan rates (9, 16, 25, 49 and 64  $\text{mV/s}$  from inner to outer) for the interface between 5 mM BTPPATPFB + 50  $\mu\text{M}$   $\text{H}_2\text{TPP}$  in DCE and 10 mM LiCl + 100 mM HCl in water; (b) The first anodic peak current as a function of the square root of the scan rate.

## S2. Cyclic voltammetry at various concentrations of H<sub>2</sub>TPP

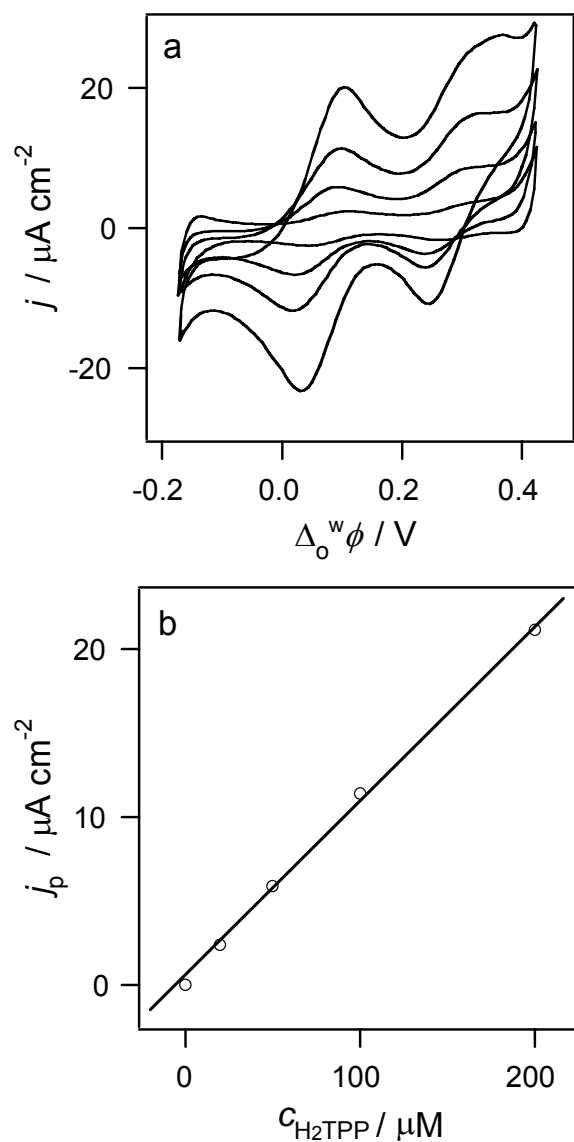

Figure S2. (a) CVs (25 mV/s) at various concentrations of H<sub>2</sub>TPP in DCE (20, 50, 100 and 200 μM, from inner to outer): 5 mM BTPPATPFB in DCE and 10 mM LiCl + 100 mM HCl in water; (b) The first anodic peak current as a function of H<sub>2</sub>TPP concentration.

### S3. Cyclic voltammetry of 50 $\mu\text{M}$ $\text{H}_2\text{TPP}$ at various pH

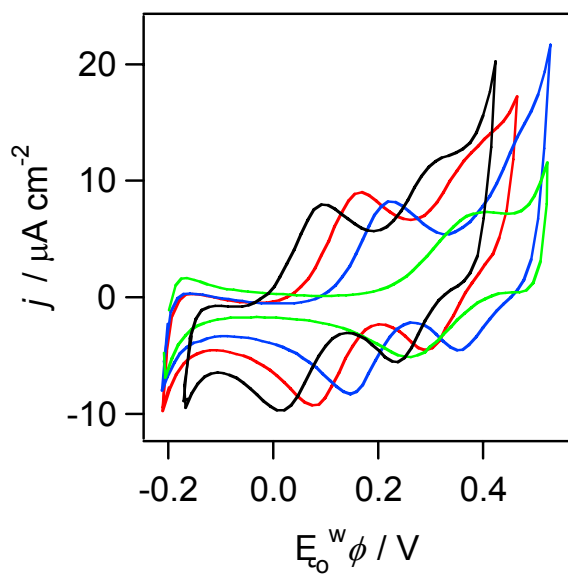

Figure S3. CVs (49 mV/s) at various aqueous pH (1, black; 2, red; 3, blue; 5, green;): 5 mM BTPPATPFB in DCE and 10 mM LiCl in water, and the water phase acidified by HCl.
